# Supplementary material for: Intriguing the significance of hydrophobic groove by the inhibitory mechanism of mineralocorticoid receptor bound with spironolactone through mutations using long-range molecular dynamics simulations in conjunction with statistical analysis
Source: Research Square preprint supplement (doi:10.21203/rs.3.rs-7272855/v1), 2025-09-15
Supplement: Supplementary file 1 [file c36a638a17ea3fe82eceb342.docx]

**SUPPORTING INFORMATION**

**Intriguing the significance of hydrophobic groove by the inhibitory mechanism of mineralocorticoid receptor bound with spironolactone through mutations using long-range molecular dynamics simulations in conjunction with statistical analysis.**

Seshan Gunalan1, Kanagasabai Somarathinam1, Ananthasri Sailapathi1, Dharani Amirtha Metilda A1, Sam Paul D.1, Vijayakumar Rajendran2, Anand Gowri Shankar3*,* Senthilkumar G P4, Jaimohan S.M.5, Gugan Kothandan1*

*1 Biopolymer Modelling Laboratory, Centre of Advanced Study in Crystallography and Biophysics, Guindy Campus, University of Madras, Chennai 600025, India*

*2  Molecular Biophysics Unit, Indian Institute of Science, Bangalore 560012, India*

*3  Learners Cortex, Kasturba Nagar, Adyar, Chennai, Tamil Nadu - 600 020, India*

*4 Department of Pharmaceutical Chemistry, Faculty of Pharmacy, Sree Balaji Medical College and Hospital Campus, Bharath Institute of Higher Education and Research (BIHER), Chromepet, Chennai -44, India*

*5 Advanced Materials Laboratory, CSIR-Central Leather Research Institute, Adyar, Chennai 600020, India*

*Author for correspondence*

*E-mail: drgugank@gmail.com*

| **COMPLEX 1** | 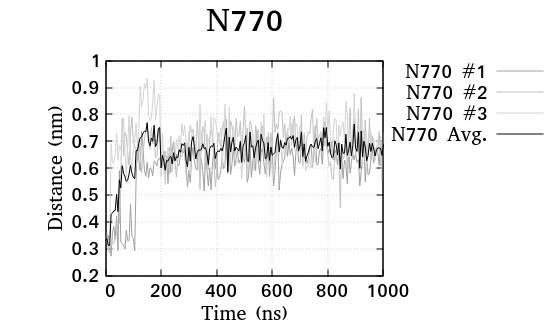 | 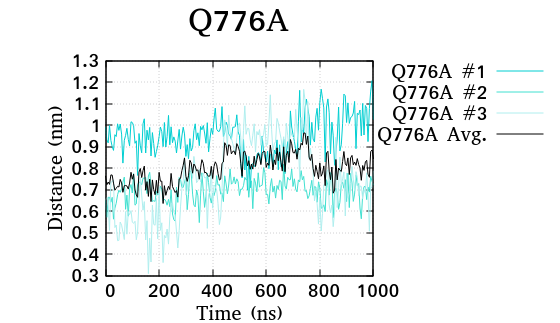 |
| --- | --- | --- |
| 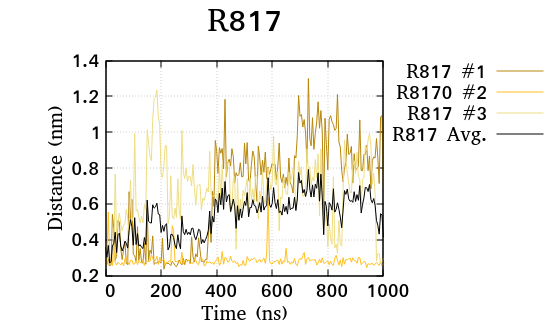 | 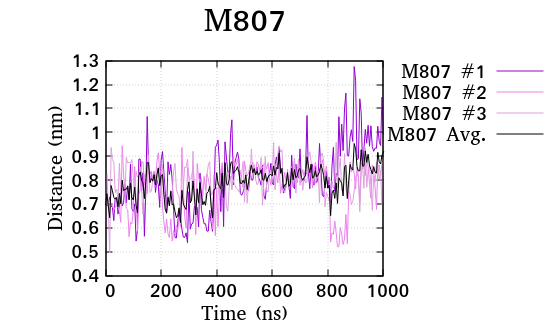 |
| 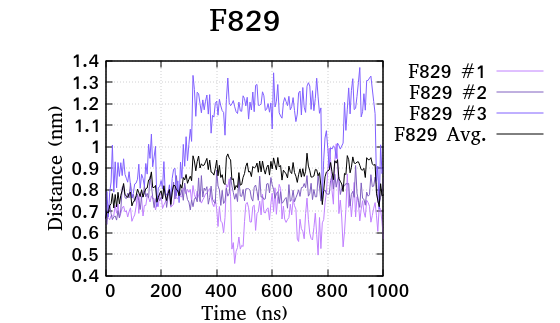 | 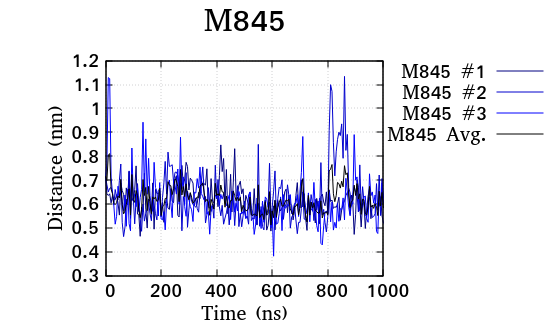 |
| 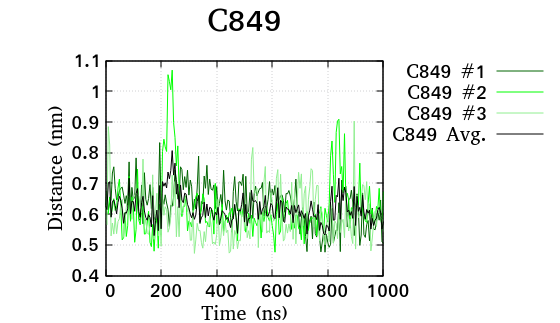 | 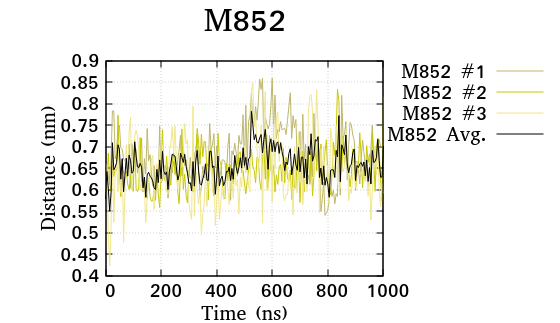 |
| 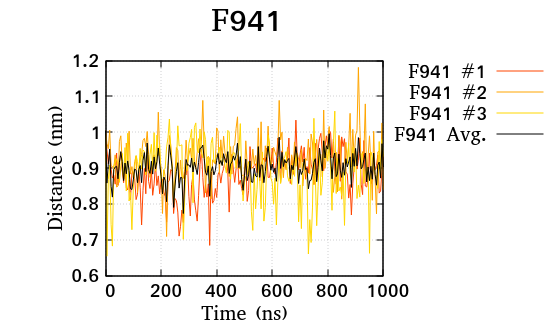 | 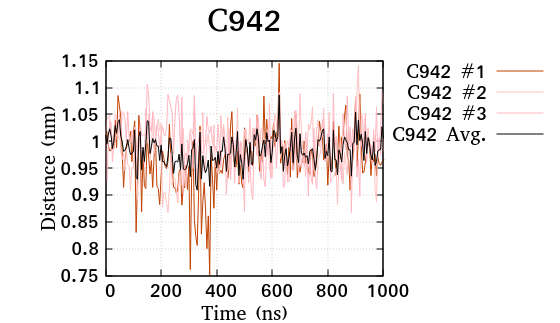 |

**Figure S1.** Inferring the interaction of the average distance plot of the triplicate between the key residues of MR-spironolactone complex-1 over the simulation of 1μs.

| **COMPLEX 2** | 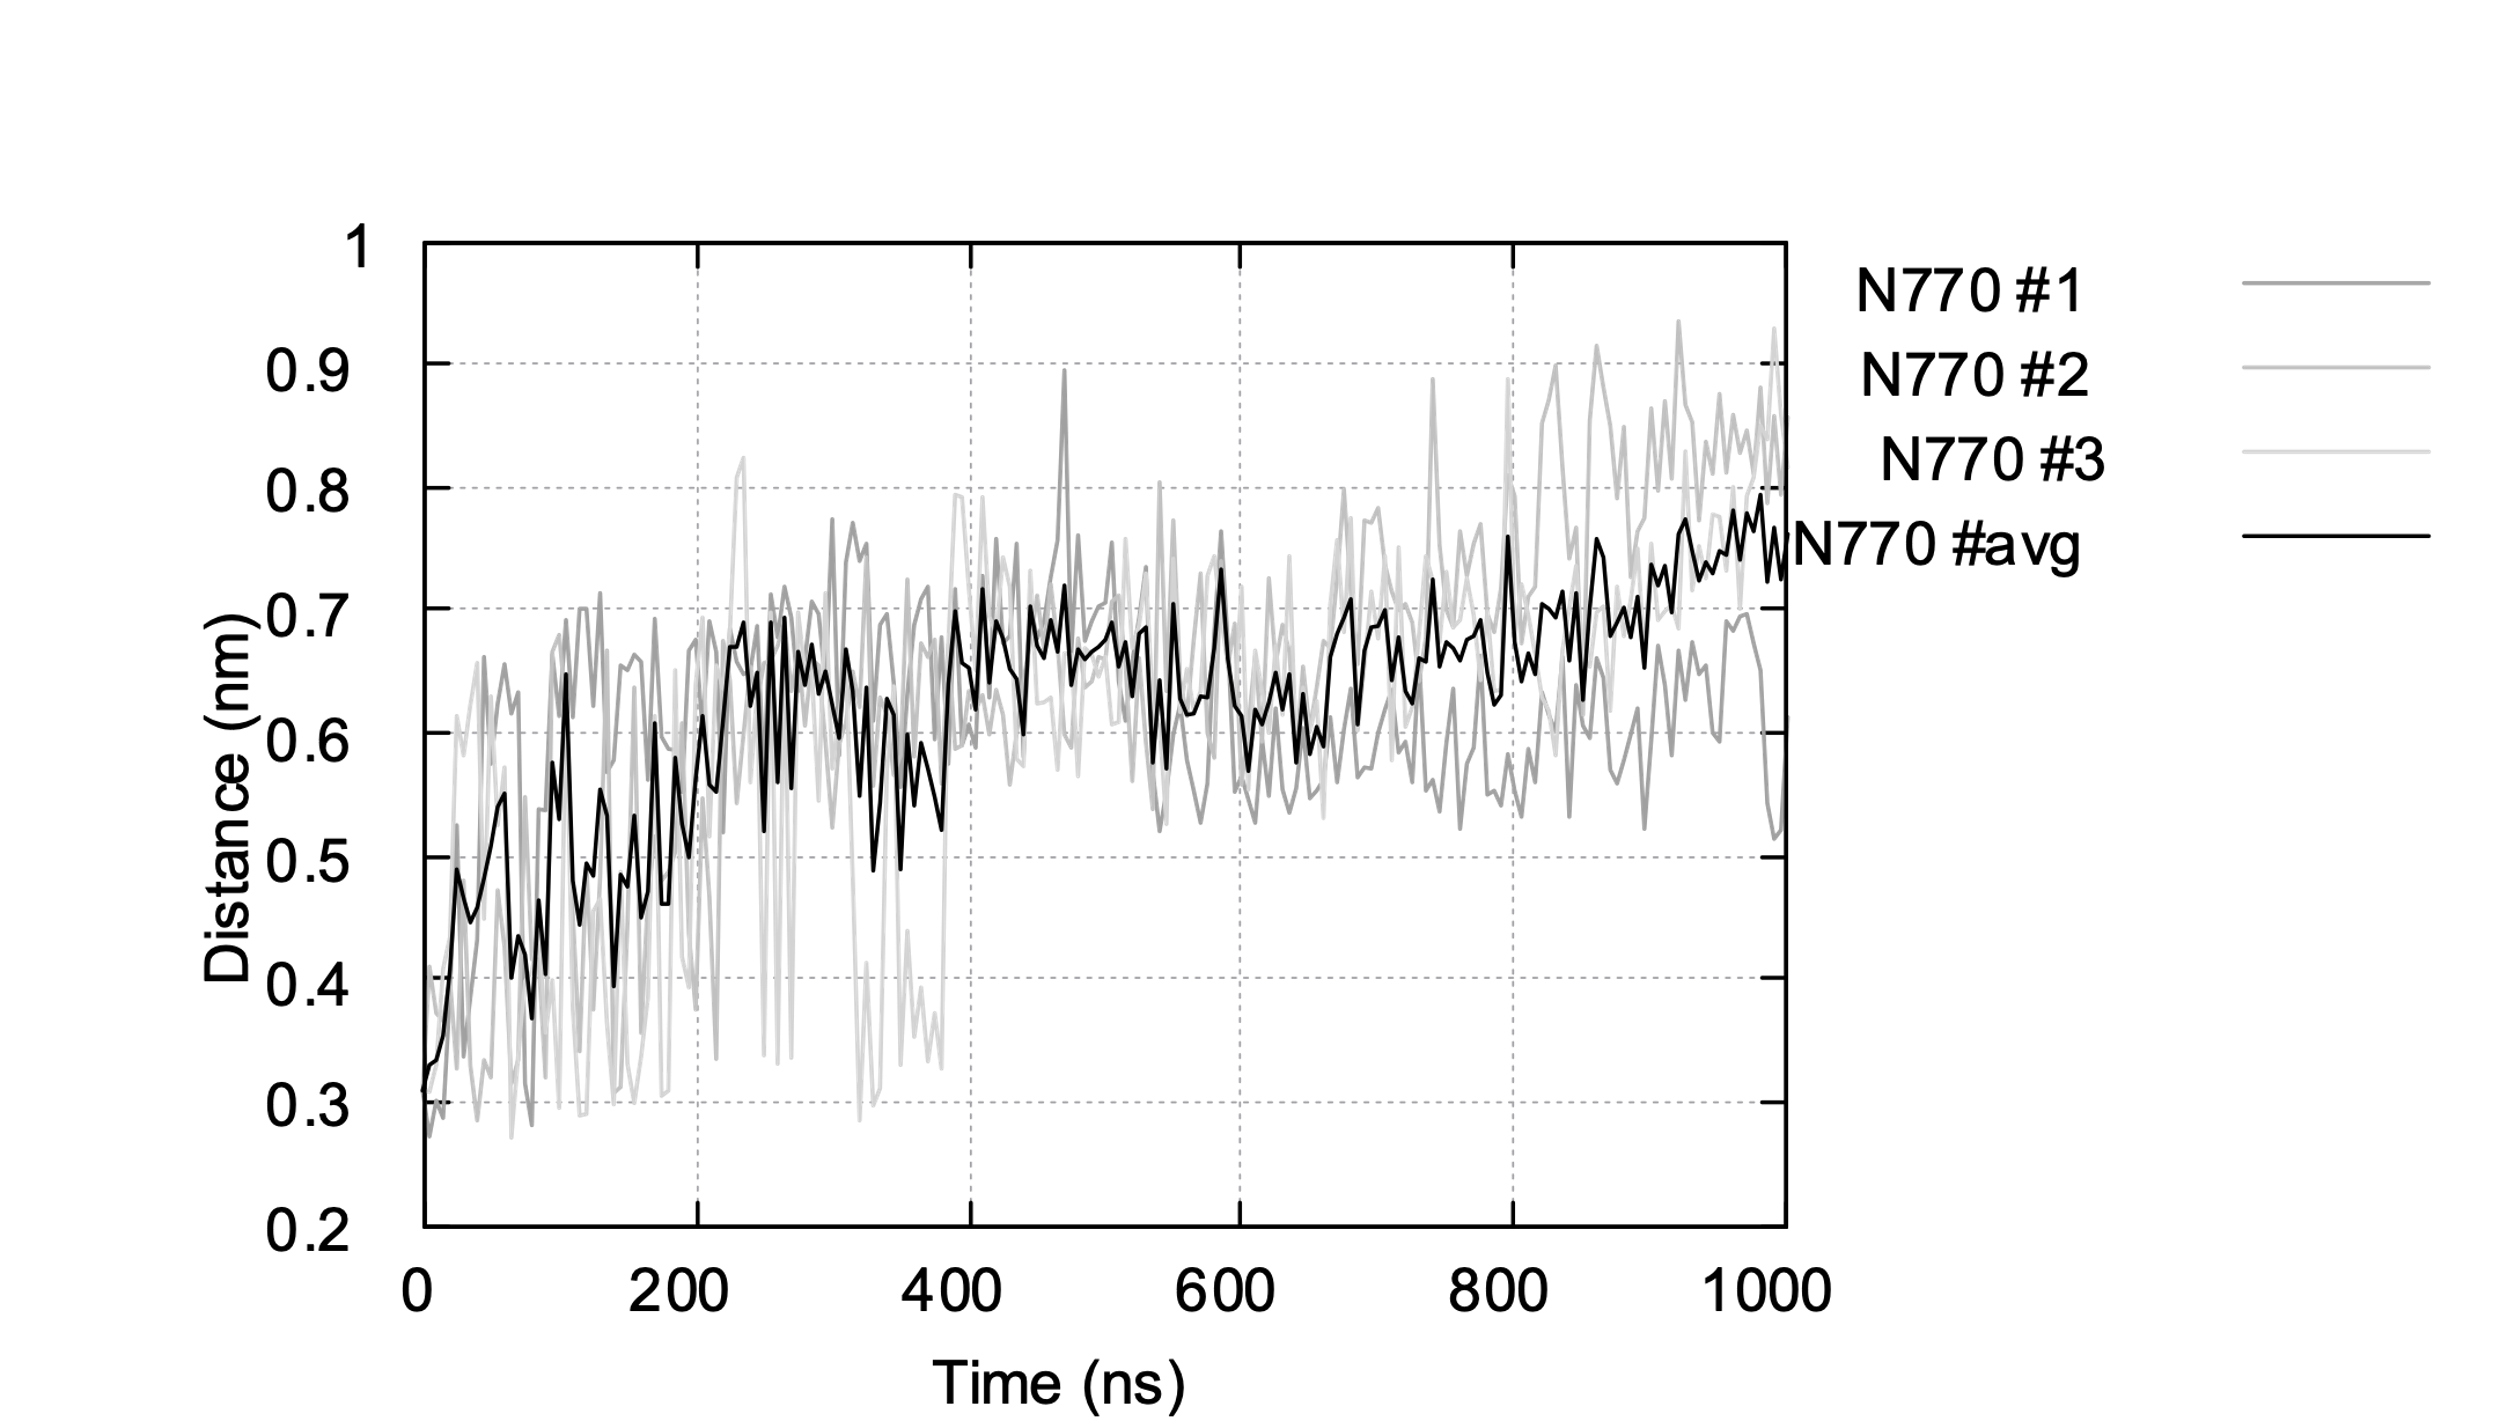 | 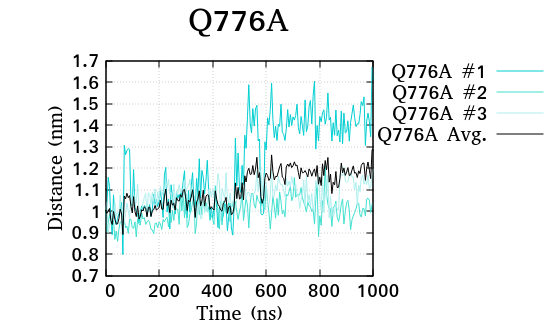 |
| --- | --- | --- |
| 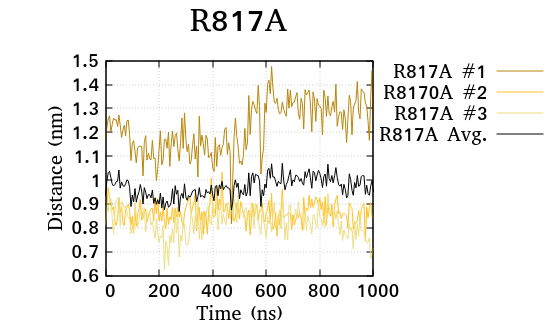 | 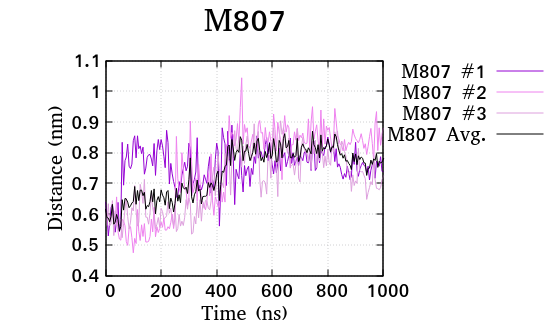 |
| 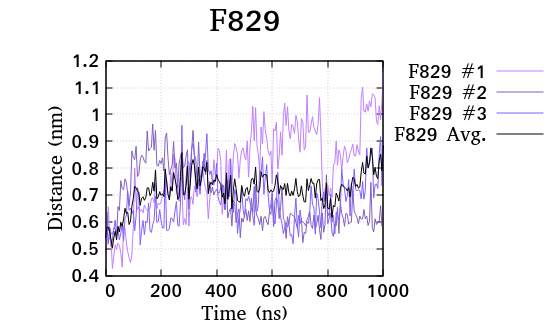 | 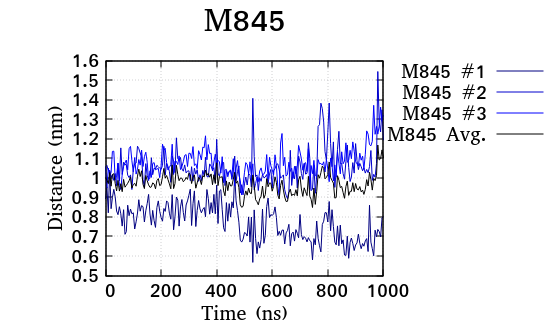 |
| 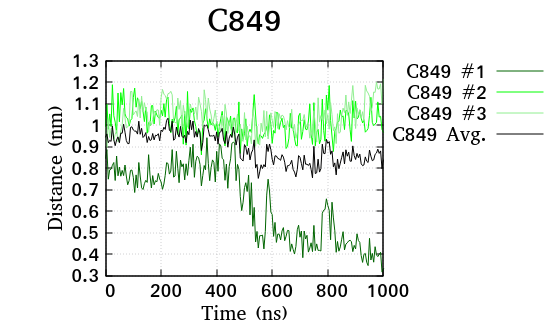 | 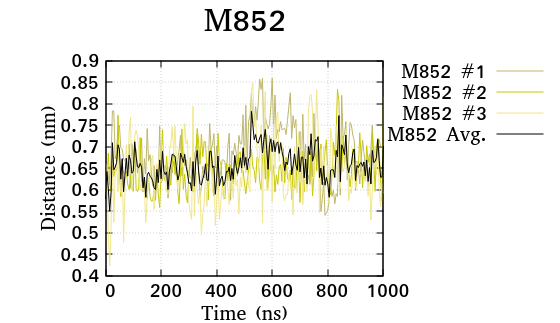 |
| 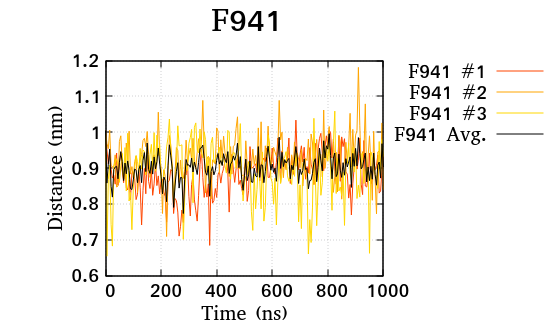 | 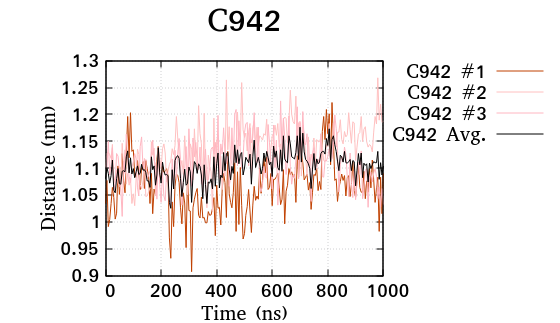 |

**Figure S2.** Inferring the interaction of the average distance plot of the triplicate between the key residues of MR-spironolactone complex-2 over the simulation of 1μs.

| **COMPLEX 3** | 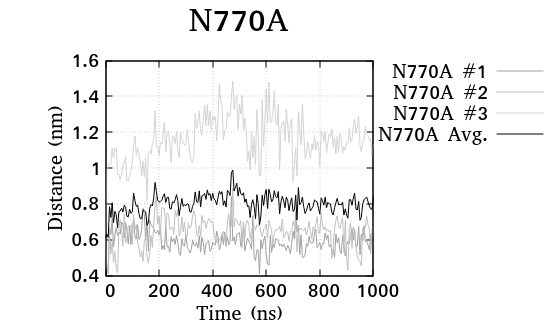 | 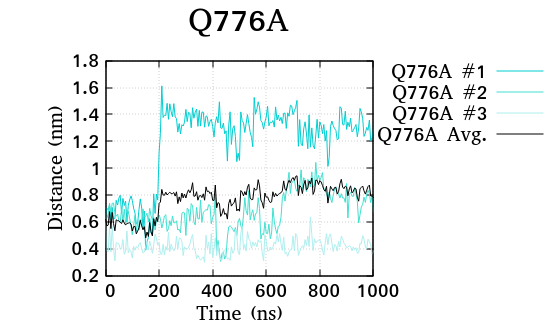 |
| --- | --- | --- |
| 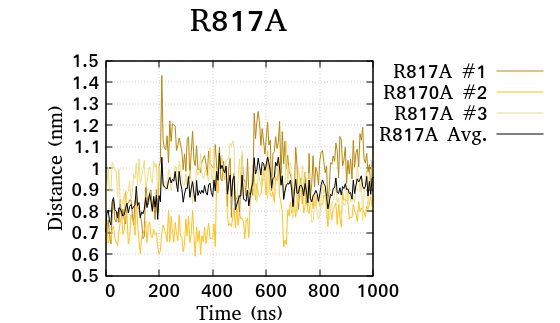 | 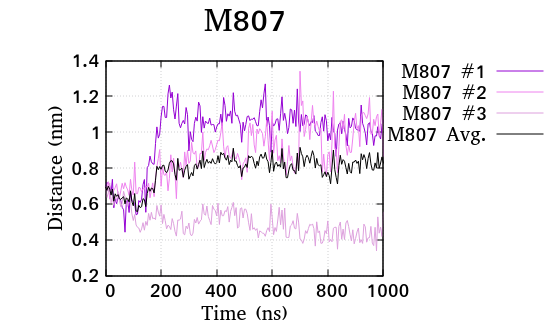 |
| 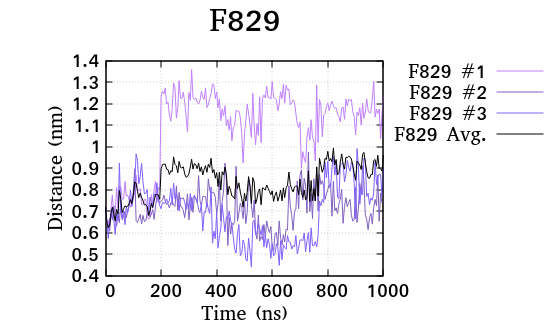 | 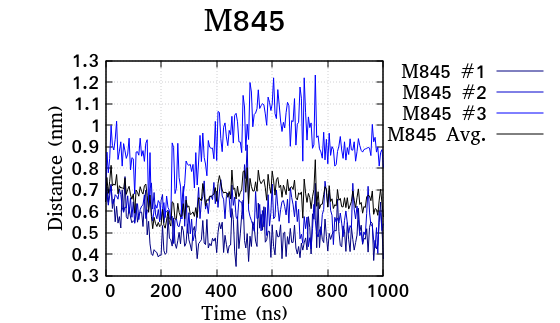 |
| 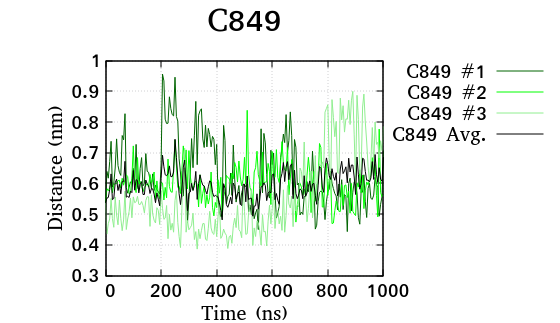 | 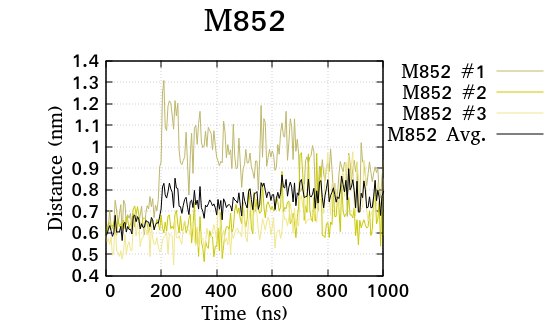 |
| 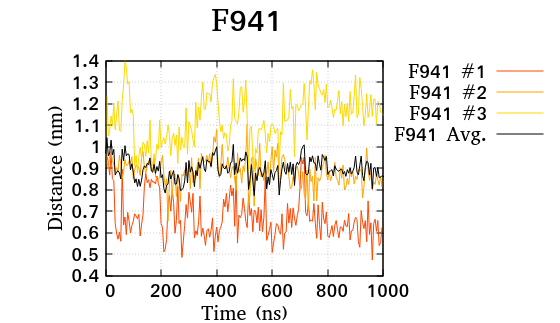 | 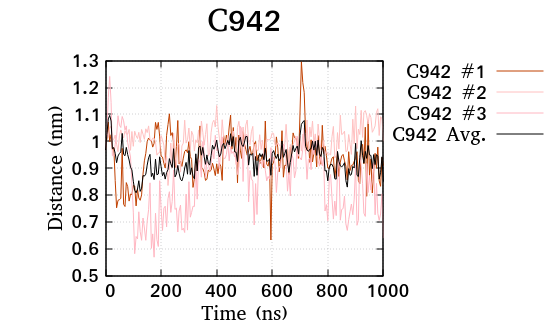 |

**Figure S3.** Inferring the interaction of the average distance plot of the triplicate between the key residues of MR-spironolactone complex-3 over the simulation of 1μs.

| **COMPLEX 4** | 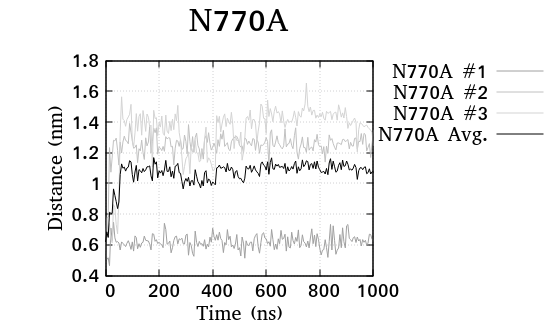 | 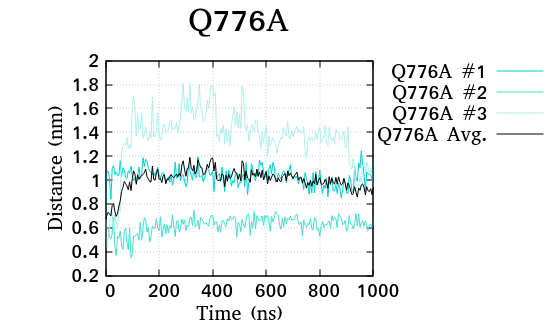 |
| --- | --- | --- |
| 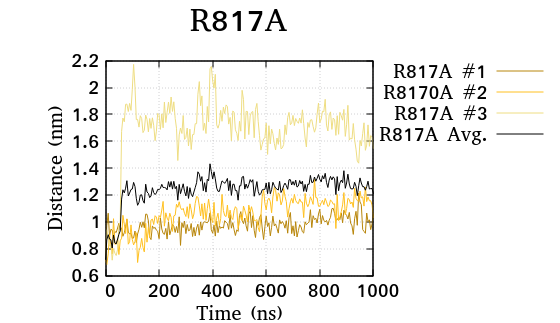 | 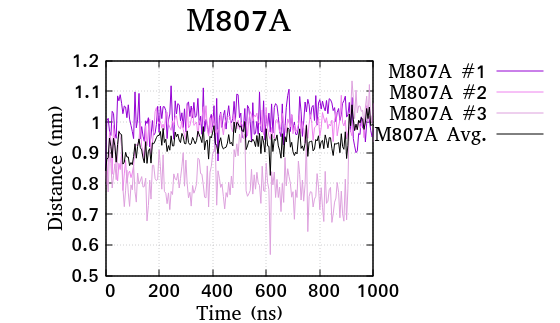 |
| 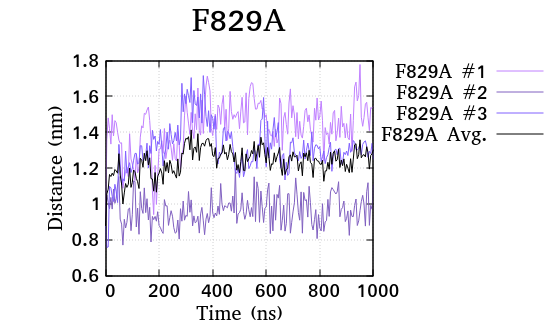 | 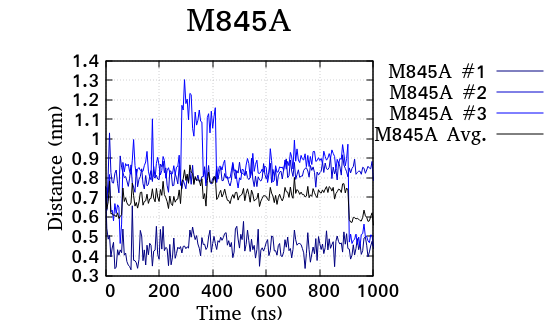 |
| 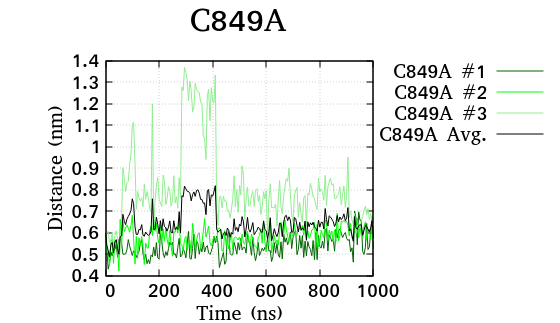 | 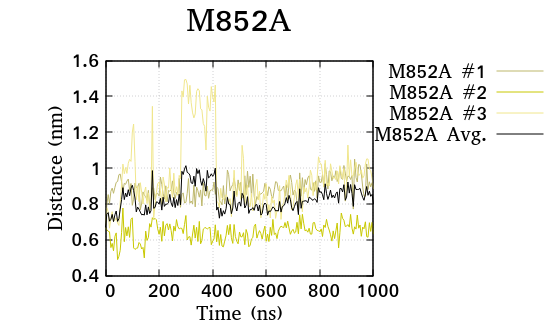 |
| 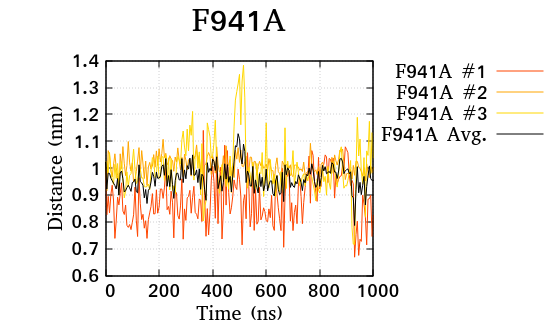 | 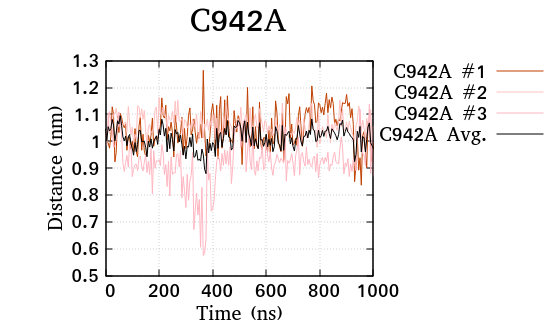 |

**Figure S4.** Inferring the interaction of the average distance plot of the triplicate between the key residues of MR-spironolactone complex-4 over the simulation of 1μs.

| **COMPLEX 5** | 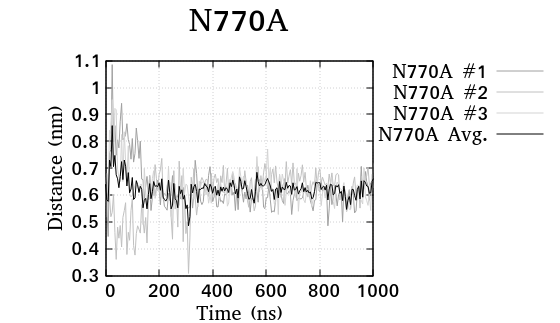 | 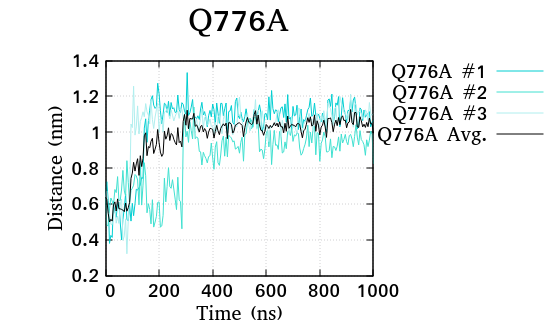 |
| --- | --- | --- |
| 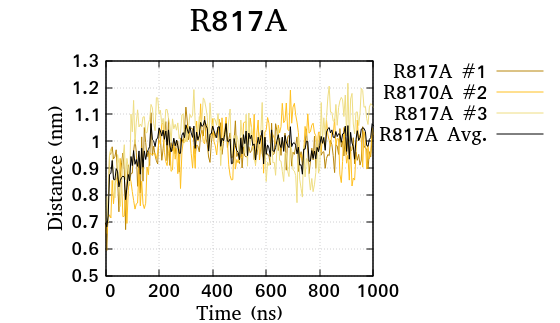 | 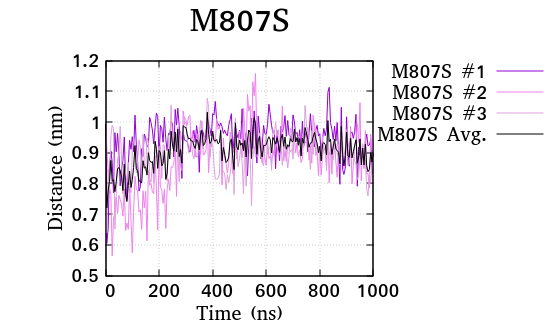 |
| 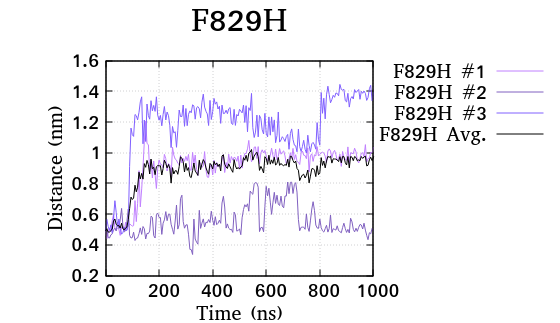 | 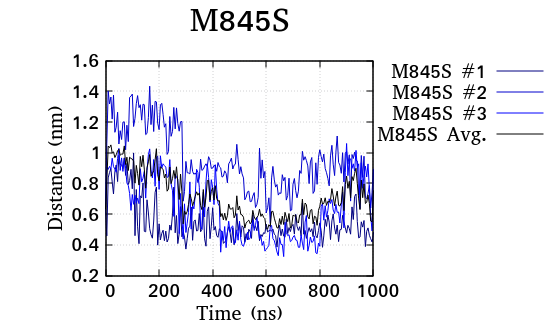 |
| 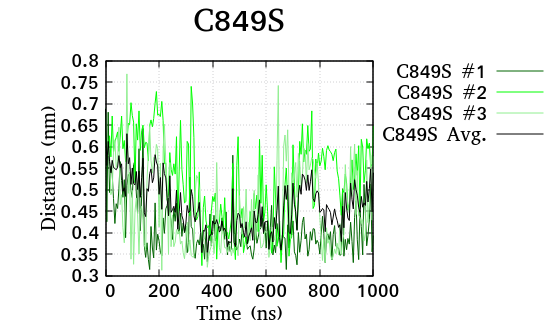 | 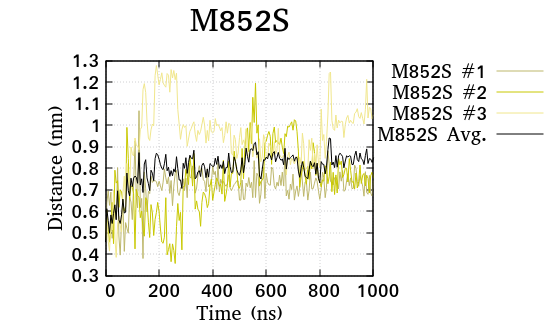 |
| 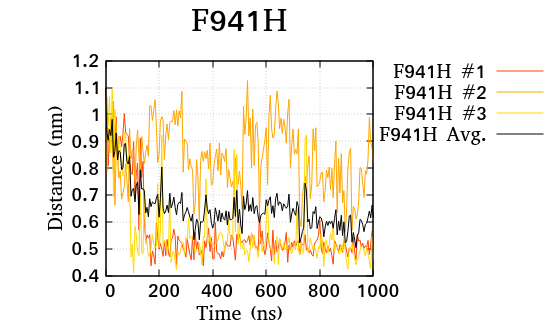 | 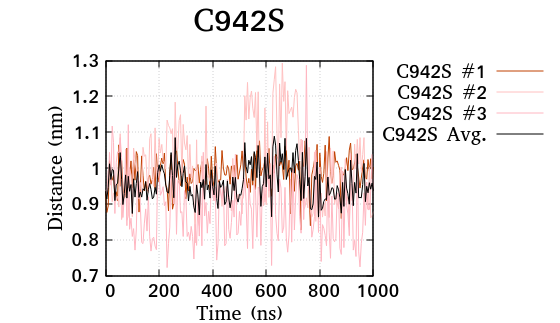 |

**Figure S5.** Inferring the interaction of the average distance plot of the triplicate between the key residues of MR-spironolactone complex-5 over the simulation of 1μs.


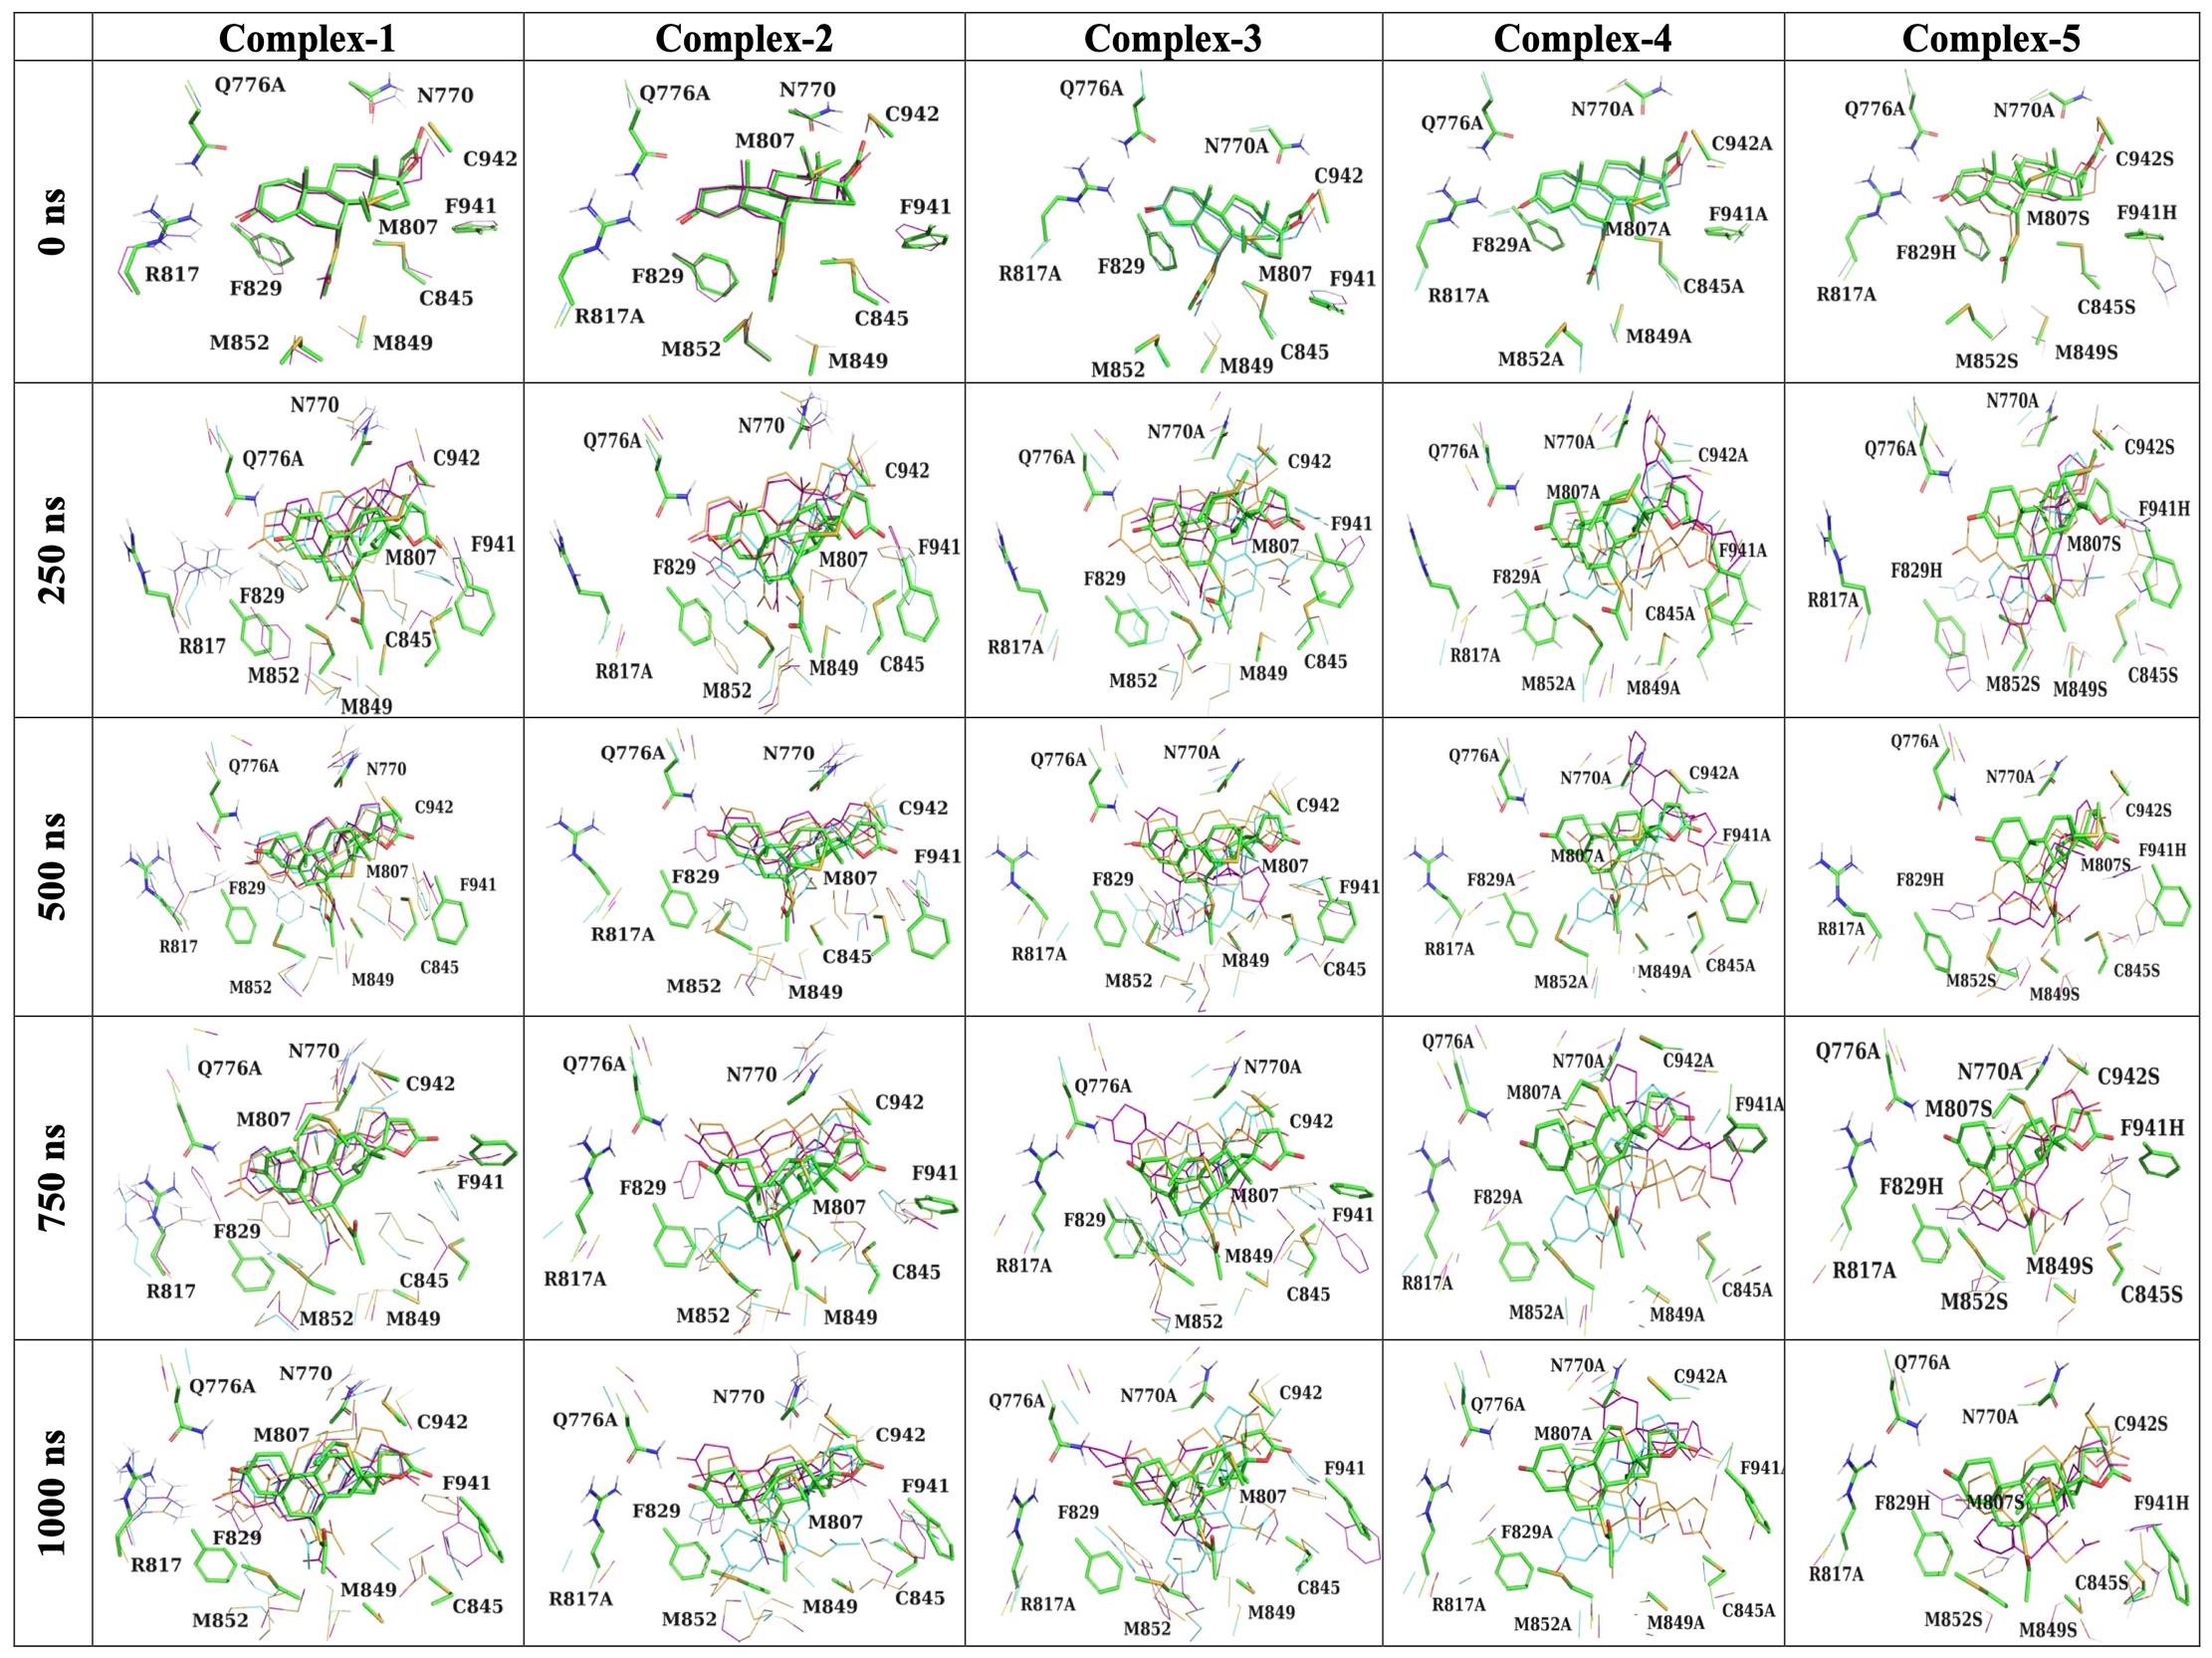
**Figure S6.** Binding interaction pattern of spironolactone (replicate #1, #2 and #3 in cyan, gold and magenta, respectively) superposed over the crystal structure of MR-spironolactone (in green) complex (PDBID: 3VHU as control) at the binding cavity of mutated Complex 1-5 highlighting the key binding residues at an interval of 250ns of simulation time.

| **Complex 5 (kcal/mol)** | Avg. | -274.275 | -53.104 | 117.37 | -19.2787 | 0 | 0 | -229.282 |
| --- | --- | --- | --- | --- | --- | --- | --- | --- |
| #3 | -275.217 | -58.779 | 114.392 | -19.158 | 0 | 0 | -238.762 |
| #2 | -278.589 | -52.741 | 114.915 | -19.26 | 0 | 0 | -235.674 |
| #1 | -269.019 | -47.792 | 122.819 | -19.418 | 0 | 0 | -213.41 |
| **Complex 4 (kcal/mol)** | Avg. | -237.565 | -19.7827 | 72.2766 | -18.7377 | 0 | 0 | -203.809 |
| #3 | -226.936 | -13.871 | 59.423 | -18.203 | 0 | 0 | -199.588 |
| #2 | -236.213 | -26.467 | 80.086 | -18.339 | 0 | 0 | -200.933 |
| #1 | -249.547 | -19.01 | 77.321 | -19.671 | 0 | 0 | -210.907 |
| **Complex 3 (kcal/mol)** | Avg. | -262.352 | -25.237 | 80.5563 | -19.6793 | 0 | 0 | -226.713 |
| #3 | -258.014 | -30.943 | 83.738 | -19.24 | 0 | 0 | -224.459 |
| #2 | -271.39 | -26.993 | 80.478 | -19.902 | 0 | 0 | -237.808 |
| #1 | -257.653 | -17.775 | 77.453 | -19.896 | 0 | 0 | -217.871 |
| **Complex 2 (kcal/mol)** | Avg. | -271.974 | -24.74 | 81.91 | -19.3057 | 0 | 0 | -234.11 |
| #3 | -277.444 | -14.659 | 75.904 | -19.805 | 0 | 0 | -236.003 |
| #2 | -267.128 | -21.562 | 80.037 | -19.295 | 0 | 0 | -227.948 |
| #1 | -271.35 | -37.999 | 89.789 | -18.817 | 0 | 0 | -238.378 |
| **Complex 1 (kcal/mol)** | Avg. | -272.909 | -41.2233 | 99.50267 | -19.5397 | 0 | 0 | -234.169 |
| #3 | -275.276 | -48.912 | 109.174 | -19.162 | 0 | 0 | -234.177 |
| #2 | -280.604 | -52.75 | 112.479 | -19.611 | 0 | 0 | -240.486 |
| #1 | -262.846 | -22.008 | 76.855 | -19.846 | 0 | 0 | -227.845 |
| **MR-Spironolactone interaction** | | **van der Waal energy** | **Electrostatic energy** | **Polar solvation energy** | **SASA energy** | **SAV energy** | **WCA energy** | **Binding energy** |

| **Complex 5 (kcal/mol)** | Avg. | -9.97233 | 11.796 | -16.9593 | -6.80833 | 0 | 0 | -21.9433 |
| --- | --- | --- | --- | --- | --- | --- | --- | --- |
| #3 | -7.024 | 18.876 | -27.064 | -6.153 | 0 | 0 | -21.365 |
| #2 | -7.034 | 20.525 | -18.539 | -5.737 | 0 | 0 | -10.784 |
| #1 | -15.859 | -4.013 | -5.275 | -8.535 | 0 | 0 | -33.681 |
| **Complex 4 (kcal/mol)** | Avg. | -34.085 | -1.575 | 9.907 | -5.98267 | 0 | 0 | -31.7363 |
| #3 | -18.663 | -0.583 | 3.211 | -3.626 | 0 | 0 | -19.662 |
| #2 | -34.27 | -7.686 | 16.773 | -6.894 | 0 | 0 | -32.077 |
| #1 | -49.322 | 3.544 | 9.737 | -7.428 | 0 | 0 | -43.47 |
| **Complex 3 (kcal/mol)** | Avg. | -73.3747 | -6.028 | 24.344 | -10.306 | 0 | 0 | -65.365 |
| #3 | -60.76 | -15.414 | 30.776 | -8.699 | 0 | 0 | -54.098 |
| #2 | -77.657 | -0.356 | 18.217 | -10.865 | 0 | 0 | -70.662 |
| #1 | -81.707 | -2.314 | 24.039 | -11.354 | 0 | 0 | -71.335 |
| **Complex 2 (kcal/mol)** | Avg. | -63.891 | 0.784 | 14.122 | -8.778 | 0 | 0 | -57.7627 |
| #3 | -51.41 | -0.251 | 8.951 | -7.233 | 0 | 0 | -49.943 |
| #2 | -53.268 | 2.207 | 11.661 | -7.767 | 0 | 0 | -47.167 |
| #1 | -86.995 | 0.396 | 21.754 | -11.334 | 0 | 0 | -76.178 |
| **Complex 1 (kcal/mol)** | Avg. | -74.9317 | 1.838667 | 16.83467 | -10.535 | 0 | 0 | -66.7937 |
| #3 | -74.335 | 2.073 | 18.141 | -11.157 | 0 | 0 | -65.279 |
| #2 | -78.73 | 2.729 | 16.373 | -11.364 | 0 | 0 | -70.992 |
| #1 | -71.73 | 0.714 | 15.99 | -9.084 | 0 | 0 | -64.11 |
| **Hydrophobic grove of MR-Spironolactone interaction** | | **van der Waal energy** | **Electrostatic energy** | **Polar solvation energy** | **SASA energy** | **SAV energy** | **WCA energy** | **Binding energy** |

**Table S1**. The various MM/PBSA terms calculated (averaging the triplicate) for the binding of mutated MR complexed 1-5 with Spironolactone using g_mmpbsa modules (Kumari R, *et.al.*).

**Table S2**. The evaluation of various MM/PBSA terms calculated (averaging the triplicate) for the hydrophobic grove of mutated MR complexed 1-5 with Spironolactone using g_mmpbsa modules (Kumari R, *et.al.*)

**Table S3.** One-Way Analysis of Variance of the key binding residues of the mutated complex 1-5 compared with control (compound 6: Crystal structure PDB ID-VHU) using using IBM SPSS Statistics (Version 25).

| **Dependent  Variable** | **(I)  Complex No. (control)** | **(J)  Complex No.** | **Shapiro- Wilk Test for Normality** | **Multiple Comparisons  (ANOVA) - LSD** | **ANOVA** | **Sum of  Squares** | **df** | **Mean  Square** | **F** | **Sig.** |
| --- | --- | --- | --- | --- | --- | --- | --- | --- | --- | --- |
| **Sig.** | **P Value** |
| N770 | 6 | 1 | 0.693 | P>0.0001 | Between | 24.973 | 5 | 4.995 | 1752.86 | 0 |
| 2 | 0.002 | P>0.0001 | Groups |
| 3 | 0.032 | P>0.0001 | Within | 2.889 | 1014 | 0.003 |  |  |
| 4 | 0 | P>0.0001 | Groups |  |  |
| 5 | 0 | P>0.0001 | Total | 27.862 | 1019 |  |  |  |
| 6 | 0.837 |  |  |  |  |
| Q776 | 6 | 1 | 0.252 | P>0.0001 | Between | 22.349 | 5 | 4.47 | 952.47 | 0 |
| 2 | 0 | P>0.0001 | Groups |
| 3 | 0 | P>0.0001 | Within | 4.759 | 1014 | 0.005 |  |  |
| 4 | 0.218 | P>0.0001 | Groups |  |  |
| 5 | 0 | P>0.0001 | Total | 27.108 | 1019 |  |  |  |
| 6 | 0.197 |  |  |  |  |
| R817 | 6 | 1 | 0.007 | P>0.0001 | Between | 43.466 | 5 | 8.693 | 2025.681 | 0 |
| 2 | 0.406 | P>0.0001 | Groups |
| 3 | 0.041 | P=0.769 | Within | 4.352 | 1014 | 0.004 |  |  |
| 4 | 0.592 | P>0.0001 | Groups |  |  |
| 5 | 0.009 | P>0.0001 | Total | 47.817 | 1019 |  |  |  |
| 6 | 0.005 |  |  |  |  |
| M807 | 6 | 1 | 0.001 | P>0.0001 | Between | 6.496 | 5 | 1.299 | 319.877 | 0 |
| 2 | 0 | P>0.0001 | Groups |
| 3 | 0.003 | P>0.0001 | Within | 4.119 | 1014 | 0.004 |  |  |
| 4 | 0.023 | P>0.0001 | Groups |  |  |
| 5 | 0.324 | P>0.0001 | Total | 10.615 | 1019 |  |  |  |
| 6 | 0 |  |  |  |  |
| F829 | 6 | 1 | 0 | P>0.0001 | Between | 42.116 | 5 | 8.423 | 2072.117 | 0 |
| 2 | 0.018 | P>0.0001 | Groups |
| 3 | 0 | P>0.0001 | Within | 4.122 | 1014 | 0.004 |  |  |
| 4 | 0.618 | P>0.0001 | Groups |  |  |
| 5 | 0.355 | P>0.0001 | Total | 46.238 | 1019 |  |  |  |
| 6 | 0 |  |  |  |  |
| M845 | 6 | 1 | 0.001 | P>0.0001 | Between | 20.012 | 5 | 4.002 | 692.944 | 0 |
| 2 | 0.01 | P>0.001 | Groups |
| 3 | 0.584 | P>0.0001 | Within | 5.857 | 1014 | 0.006 |  |  |
| 4 | 0 | P>0.0001 | Groups |  |  |
| 5 | 0 | P>0.0001 | Total | 25.868 | 1019 |  |  |  |
| 6 | 0 |  |  |  |  |

…contd.

| C849 | 6 | 1 | 0 | P>0.0001 | Between | 17.032 | 5 | 3.406 | 984.201 | 0 |
| --- | --- | --- | --- | --- | --- | --- | --- | --- | --- | --- |
| 2 | 0 | P>0.0001 | Groups |
| 3 | 0.298 | P>0.0001 | Within | 3.51 | 1014 | 0.003 |  |  |
| 4 | 0 | P>0.0001 | Groups |  |  |
| 5 | 0.016 | P>0.0001 | Total | 20.542 | 1019 |  |  |  |
| 6 | 0.001 |  |  |  |  |
| M852 | 6 | 1 | 0.039 | P>0.0001 | Between | 16.858 | 5 | 3.372 | 1362.157 | 0 |
| 2 | 0.566 | P>0.0001 | Groups |
| 3 | 0.511 | P>0.0001 | Within | 2.51 | 1014 | 0.002 |  |  |
| 4 | 0 | P>0.0001 | Groups |  |  |
| 5 | 0.471 | P>0.0001 | Total | 19.368 | 1019 |  |  |  |
| 6 | 0 |  |  |  |  |
| F941 | 6 | 1 | 0.075 | P>0.0001 | Between | 28.012 | 5 | 5.602 | 2551.504 | 0 |
| 2 | 0.597 | P>0.0001 | Groups |
| 3 | 0.266 | P>0.0001 | Within | 2.226 | 1014 | 0.002 |  |  |
| 4 | 0.029 | P>0.0001 | Groups |  |  |
| 5 | 0.355 | P>0.0001 | Total | 30.239 | 1019 |  |  |  |
| 6 | 0.382 |  |  |  |  |
| C942 | 6 | 1 | 0.236 | P>0.0001 | Between | 17.748 | 5 | 3.55 | 1627.018 | 0 |
| 2 | 0.023 | P>0.0001 | Groups |
| 3 | 0.025 | P>0.0001 | Within | 2.212 | 1014 | 0.002 |  |  |
| 4 | 0.055 | P>0.0001 | Groups |  |  |
| 5 | 0.003 | P>0.0001 | Total | 19.96 | 1019 |  |  |  |
| 6 | 0.001 |  |  |  |  |

****************************

**Data Availability:** [**https://doi.org/10.5281/zenodo.10374814**](https://doi.org/10.5281/zenodo.10374814)

1. Supplementary_statistics.xlsx

**Sheet 1:** Table SA1. Boolean values indicating the presence or lack of interaction between the spironolactone and crucial residues of MR (0:absence and 1:presence)

**Sheet 2:** Table SA2. The distance between the key residues of MR complex 1-6 with the spironolactone over the simulation time of 5ns interval of 1μs.

**Sheet 3:** Table SA3. The input data provided for the ANOVA analysis from the trajectories of simulation studies.
